# Supplementary material
Source: HighWire-hosted journal article supplement (https://cmaj.ca/highwire/filestream/72375/field_highwire_adjunct_files/5/181067-res-6-at.pdf)
Supplement: 181067-res-6-at.pdf [file 181067-res-6-at.pdf]

# Appendix 6 (as supplied by the authors): Association between cesarean delivery and severe acute intra or postpartum maternal morbidity according to the underlying causal condition of SAMM

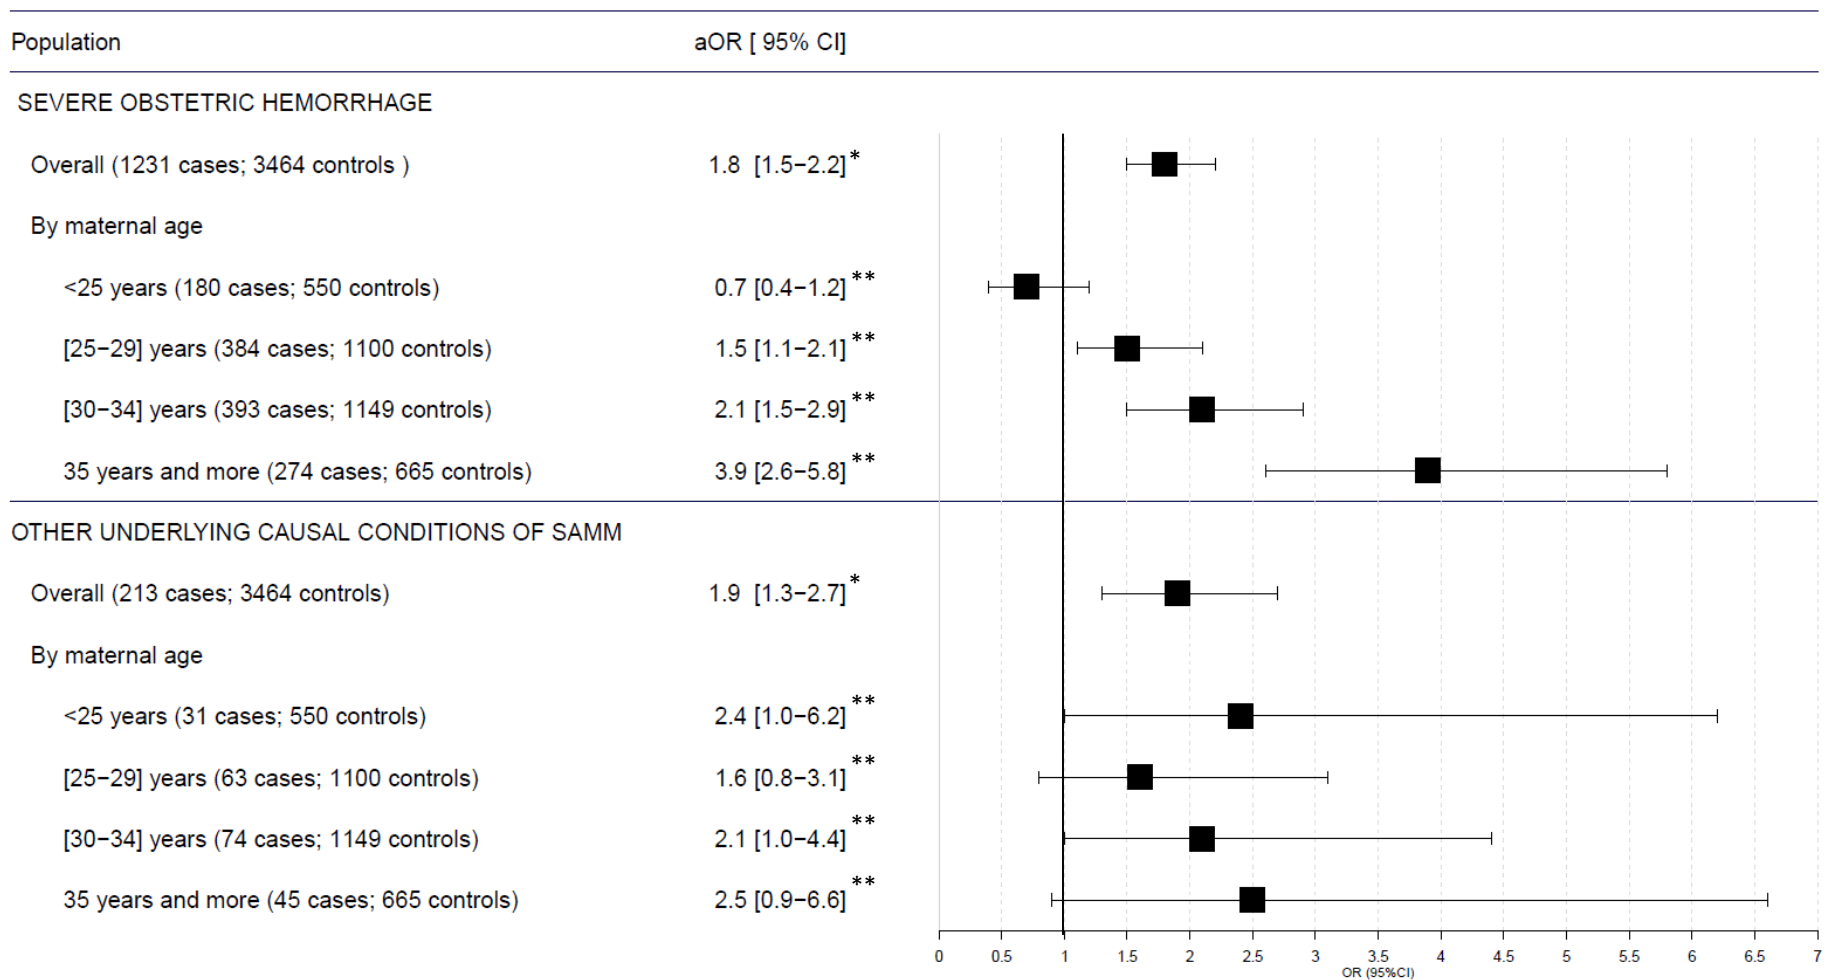

\*adjusted for: maternal age, country of birth, living without partner, age, body mass index, smoker, pre-existing medical condition, parity and prior cesarean delivery, previous obstetric hemorrhage, previous gestational hypertensive disorders, multiple pregnancy, in vitro fertilization, gestational hypertensive disorder, anemia in 3rd trimester, breech presentation, absence of prophylactic oxytocin after birth, LGA, gestational age at delivery, maternity unit status; after multiple imputation

\*\*adjusted for: country of birth, living without partner, age, body mass index, smoker, pre-existing medical condition, parity and prior cesarean delivery, previous obstetric hemorrhage, previous gestational hypertensive disorders, multiple pregnancy, in vitro fertilization, gestational hypertensive disorder, anemia in 3rd trimester, breech presentation, absence of prophylactic oxytocin after birth, LGA, gestational age at delivery, maternity unit status; after multiple imputation

Appendix to: Korb D, Goffinet F, Seco A, et al.; for the EPIMOMS Study Group. Risk of severe maternal morbidity associated with cesarean delivery and the role of maternal age: a population-based propensity score analysis. *CMAJ* 2019. doi: 10.1503/cmaj.181067. Copyright © 2019 The Author(s) or their employer(s).  
To receive this resource in an accessible format, please contact us at [cmajgroup@cmaj.ca](mailto:cmajgroup@cmaj.ca).
